# Supplementary material for: A Systematic Review of Interventions to Improve Initiation of Mental Health Care Among Racial-Ethnic Minority Groups
Source: Atypon-hosted journal article supplement (doi:10.1176/appi.ps.201700382), 2018-05-02
Supplement: appi.ps.201700382.ds001.pdf [file appi.ps.201700382.ds001.pdf]

**Online supplement.** Identification of eligible studies in systematic review of interventions for reducing racial/ethnic disparities in accessing mental health care.

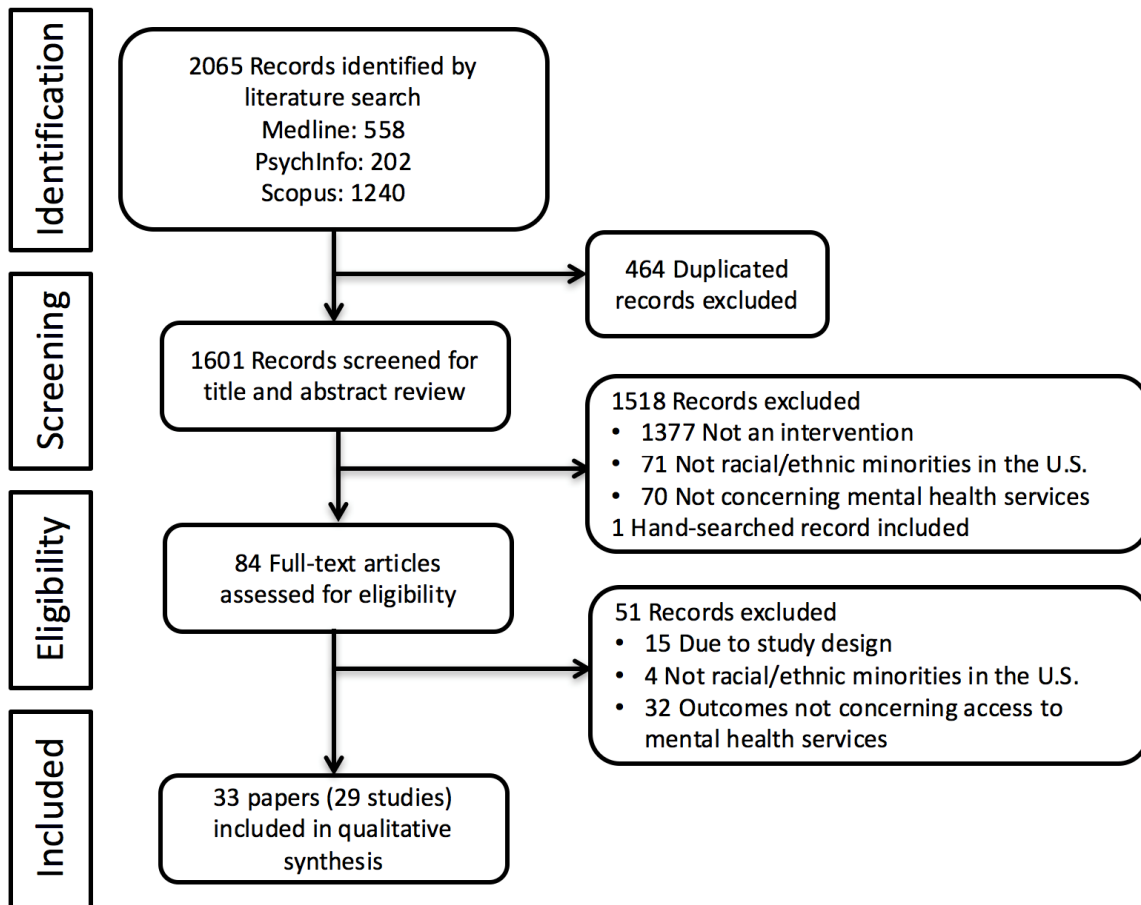

Supplemental Search Terms. Search strategy used for this systematic review.

#### PubMed Search Terms

("Alabama"[TIAB] OR "AL"[TIAB] OR "Alaska"[TIAB] OR "AK"[TIAB] OR "Arizona"[TIAB] OR AZ[TIAB] OR "Arkansas"[TIAB] OR AR[TIAB] OR "California"[TIAB] OR "CA"[TIAB] OR "Colorado"[TIAB] OR "CO"[TIAB] OR "Connecticut"[TIAB] OR "CT"[TIAB] OR "Delaware"[TIAB] OR "DE"[TIAB] OR "District of Columbia"[TIAB] OR "DC"[TIAB] OR "Florida"[TIAB] OR "FL"[TIAB] OR "Georgia"[TIAB] OR "GA"[TIAB] OR "Hawaii"[TIAB] OR "HI"[TIAB] OR "Idaho"[TIAB] OR "ID"[TIAB] OR "Illinois"[TIAB] OR "IL"[TIAB] OR "Indiana"[TIAB] OR "Iowa"[TIAB] OR "IA"[TIAB] OR "Kansas"[TIAB] OR "KS"[TIAB] OR "Kentucky"[TIAB] OR "KY"[TIAB] OR "Louisiana"[TIAB] OR "LA"[TIAB] OR "Maine"[TIAB] OR "ME"[TIAB] OR "Maryland"[TIAB] OR "MD"[TIAB] OR "Massachusetts"[TIAB] OR "MA"[TIAB] OR "Michigan"[TIAB] OR "MI"[TIAB] OR "Minnesota"[TIAB] OR "MN"[TIAB] OR "Mississippi"[TIAB] OR "MS"[TIAB] OR "Missouri"[TIAB] OR "MO"[TIAB] OR "Montana"[TIAB] OR "MT"[TIAB] OR "Nebraska"[TIAB] OR "NE"[TIAB] OR "Nevada"[TIAB] OR "NV"[TIAB] OR "New Hampshire"[TIAB] OR "NH"[TIAB] OR "New Jersey"[TIAB] OR "NJ"[TIAB] OR "New Mexico"[TIAB] OR "NM"[TIAB] OR "New York"[TIAB] OR "NY"[TIAB] OR "North Carolina"[TIAB] OR "NC"[TIAB] OR "North Dakota"[TIAB] OR "ND"[TIAB] OR "Ohio"[TIAB] OR "OH"[TIAB] OR "Oklahoma"[TIAB] OR "OK"[TIAB] OR "Oregon"[TIAB] OR "Pennsylvania"[TIAB] OR "PA"[TIAB] OR "Rhode Island"[All Fields] OR "RI"[TIAB] OR "South Carolina"[TIAB] OR "SC"[TIAB] OR "South Dakota"[TIAB] OR "SD"[TIAB] OR "Tennessee"[TIAB] OR "TN"[TIAB] OR "Texas"[TIAB] OR "TX"[TIAB] OR "Utah"[TIAB] OR "UT"[TIAB] OR "Vermont"[TIAB] OR "VT"[TIAB] OR "Virginia"[TIAB] OR "VA"[TIAB] OR "Washington"[TIAB] OR "WA"[TIAB] OR "West Virginia"[TIAB] OR "WV"[TIAB] OR "Wisconsin"[TIAB] OR "WI"[TIAB] OR "Wyoming"[TIAB] OR "WY"[TIAB] OR US[tiab] OR USA[tiab] OR "united states"[mesh]) AND ("clinical trial"[pt] OR "controlled clinical trial"[pt] OR "Environmental scan"[tiab] OR "follow-up studies"[mesh] OR "multicenter study"[pt] OR "Pilot projects"[mesh] OR "Pilot studies"[tiab] OR "Pilot study"[tiab] OR "randomized controlled trial"[pt] OR "retrospective studies"[mesh] OR "systematic"[sb] OR "treatment outcome"[mesh] OR "Intervention"[tiab] OR "interventional"[tiab] OR "interventions"[tiab] OR "Interview\*"[tiab] OR "Qualitative"[tiab]) AND (("Mental Health Services"[Mesh] OR "Mental Health Services"[tiab] OR "Community Mental Health Services"[Mesh] OR "Community Mental Health Services"[tiab] OR "Healthcare Disparity"[tiab] OR "Healthcare Disparities"[tiab] OR "Healthcare Disparities"[Mesh] OR "Counseling"[Mesh] OR "Counseling"[tiab] OR "Psychotherapeutic Processes"[Mesh] OR "Social Work, Psychiatric"[Mesh] OR "psychiatric social worker"[tiab] OR "Mental Disorders/drug therapy"[Mesh] OR "Mental Disorders/diet therapy"[Mesh] OR "Mental Disorders/nursing"[Mesh] OR "Mental Disorders/prevention and control"[Mesh] OR "Mental Disorders/rehabilitation"[Mesh] OR "Mental Disorders/therapy"[Mesh] OR "Mental Disorders"[tiab]) AND ("depression"[mesh] OR "depression"[tiab] OR "depressive disorder"[mesh] OR "depressive disorder"[tiab] OR "depressive"[tiab] OR "Depressive Disorder, Major"[Mesh] OR "major depressive disorder"[tiab] OR "major depressive episode"[tiab] OR "Mood Disorders"[Mesh] OR "Mood Disorders"[tiab] OR "Seasonal Affective Disorder"[Mesh] OR "Seasonal Affective Disorder"[tiab] OR "affective disorder"[tiab] OR "Dysthymic Disorder"[Mesh] OR "Dysthymic Disorder"[tiab] OR "dysthymia"[tiab] OR "Anxiety"[Mesh] OR

"Anxiety"[tiab] OR "Phobic Disorders"[Mesh] OR "Phobic Disorders"[tiab] OR "Panic Disorder"[Mesh] OR "Panic Disorder"[tiab] OR "panic attack"[tiab] OR "generalized anxiety disorder"[tiab] OR "Stress Disorders, Post-Traumatic"[Mesh] OR "posttraumatic stress disorder"[tiab] OR "post-traumatic stress disorder"[tiab] OR "post traumatic stress disorder"[tiab] OR "Schizophrenia"[Mesh] OR "Schizophrenia"[tiab] OR "Bipolar Disorder"[Mesh] OR "Bipolar Disorder"[tiab])) AND (("Minority groups"[mesh] OR "Minority groups"[tiab] OR "bi racial"[tiab] OR "Bi-racial"[tiab] OR "Black white"[tiab] OR "black hispanic"[tiab] OR "black Asian"[tiab] OR "Black-white"[tiab] OR "black-hispanic"[tiab] OR "black-Asian"[tiab] OR "emigrants and immigrants"[mesh] OR "emigrants and immigrants"[tiab] OR "ethnic groups"[mesh] OR "ethnic groups"[tiab] OR "ethnic minorities"[tiab] OR "Ethnic minority"[tiab] OR "Ethnic racial"[tiab] OR "Ethnic-racial"[tiab] OR "ethnic/racial"[tiab] OR "Ethnic-minority"[tiab] OR "Ethnoracial"[tiab] OR "Ethno-racial"[tiab] OR "Ethnospecific"[tiab] OR "Ethno-specific"[tiab] OR "indigenous migrants"[tiab] OR (interracial[tiab] OR interracial[tiab] OR interracial[tiab] OR inter raciale[tiab] OR inter raciales[tiab] OR inter racially[tiab] OR (mixed race[tiab] OR mixed raced[tiab] OR mixed races[tiab]) OR "mixed-race"[tiab] OR (multiracial[tiab] OR multiraciality[tiab] OR multiracials[tiab] OR (multi racial[tiab] OR multi racials[tiab] OR race[tiab] AND (ethnic[tiab] OR ethnic'[tiab] OR ethnical[tiab] OR ethnically[tiab] OR ethnicallyyy[tiab] OR ethnically[tiab] OR ethnicised[tiab] OR ethnicites[tiab] OR ethnicities[tiab] OR ethnicities'[tiab] OR ethnicitis[tiab] OR ethnicitites[tiab] OR ethnicity[tiab] OR ethnicity[tiab] OR ethnicity'[tiab] OR ethnicity's[tiab] OR ethnicityonfull[tiab] OR ethnicityrelated[tiab] OR ethnicitywise[tiab] OR ethniciy[tiab] OR ethnicization[tiab] OR ethnicized[tiab] OR ethnicorigins[tiab] OR ethnics[tiab] OR ethnics'[tiab] OR ethnicsensitive[tiab] OR ethnicus[tiab] OR ethnicxbmi[tiab] OR ethnicxgender[tiab]) OR "race disparities"[tiab] OR "race-disparities"[tiab] OR "racial disparities"[tiab] OR "Racial ethnic"[tiab] OR "Racial/ethnic"[tiab] OR "Racial-ethnic"[tiab] OR "Visible minority immigrants"[tiab] OR "African Americans"[Mesh] OR "black"[tiab] OR "African immigrants"[tiab] OR "African Continental Ancestry Group"[Mesh] OR "Inuits"[Mesh] OR "alaska native"[tiab] OR "alaska natives"[tiab] OR "Inuk"[tiab] OR "Alaskan Native"[tiab] OR "Eskimo"[tiab] OR "Indians, North American"[Mesh] OR "Native american"[tiab] OR "Navajo"[tiab] OR "Cherokee"[tiab] OR "Sioux"[tiab] OR "Chippewa"[tiab] OR "Asian Americans"[Mesh] OR "Asian Continental Ancestry Group"[mesh] OR "Burmese"[tiab] OR "Burmese"[tiab] OR "Cambodians"[tiab] OR "Cambodian"[tiab] OR "Vietnamese"[tiab] OR "Vietnameses"[tiab] OR "Japanese"[tiab] OR "Koreans"[tiab] OR "Mongoloid Race"[tiab] OR "Mongoloid Races"[tiab] OR "Asiatic Race"[tiab] OR "Asiatic Races"[tiab] OR "Thai"[tiab] OR "Asians"[tiab] OR "Asian"[tiab] OR "Chinese"[tiab] OR "Hispanic Americans"[Mesh] OR "Hispanic americans"[tiab] OR "Hispanic-Americans"[Mesh] OR Hispanic[tiab] OR "Mexican Americans"[Mesh] OR "mexican-american"[tiab] OR "mexican american"[tiab] OR Mexican[tiab] OR "latino-white"[tiab] OR "latino white"[tiab] OR "latino"[tiab] OR "latinos"[tiab] OR "latina"[tiab] OR "latinas"[tiab] OR "puerto ricans"[tiab] OR "puerto rican"[tiab] OR "Oceanic Ancestry Group"[Mesh] OR "Pacific Islander"[tiab] OR "Pacific Island American"[tiab] OR "Soman"[tiab] OR "Chamorros"[tiab] OR "Native Hawaiian"[tiab] OR "Guamanian"[tiab] OR "Carolinian"[tiab] OR "Fijian"[tiab] OR "Kosraean"[tiab] OR "Melanesian"[tiab] OR "Micronesia"[tiab] OR "Palauan"[tiab] OR "Papua New Guinean"[tiab] OR "Polynesian"[tiab] OR "Solomon Islander"[tiab] OR "Tahitian"[tiab] OR "Tokelauan"[tiab] OR "Tongan"[tiab] OR

"Trukese"[tiab] OR "Chuukese"[tiab] OR "Yapese"[tiab]) AND ("access to health care"[tiab] OR "access to health services"[tiab] OR "accessibility of health services"[tiab] OR "Health Services Accessibility"[Mesh] OR "health insurance"[tiab] OR "availability of health services"[tiab] OR "delay to treatment"[tiab] OR "episodes of care"[tiab] OR ("health care"[tiab] AND ("affordability"[tiab] OR "affordable"[tiab] OR "access"[tiab] OR "accessibility"[tiab] OR "accessible"[tiab] OR "available"[tiab] OR "availability"[tiab])) OR ("health services"[All Fields] AND ("affordability"[tiab] OR "affordable"[tiab] OR "access"[tiab] OR "accessibility"[tiab] OR "accessible"[tiab] OR "available"[tiab] OR "availability"[tiab])) OR "Health Status Disparities"[Mesh] OR "health status disparities"[tiab] OR "Patient acceptance of health care"[mesh] OR "treatment episodes"[tiab] OR (underutilized[tiab] OR underutilization[tiab] OR underutilization'[tiab] OR underutilizations[tiab] OR underutilization[tiab] OR underutilize[tiab] OR underutilized[tiab] OR underutilized'[tiab] OR underutilizer[tiab] OR underutilizers[tiab] OR underutilizes[tiab] OR underutilizing[tiab]) OR "underutilization"[tiab] OR "Utilization Review"[Mesh] OR "utilisation"[tiab] OR "utilization"[tiab] OR "use"[tiab] OR (barrier[tiab] OR barrier'[tiab] OR barrier's[tiab] OR barrier1[tiab] OR barrieranalysis[tiab] OR barrierbac[tiab] OR barriercream[tiab] OR barriere[tiab] OR barriere's[tiab] OR barriered[tiab] OR barrieres[tiab] OR barrierfor[tiab] OR barriergenesis[tiab] OR barrierity[tiab] OR barrierless[tiab] OR barrierlessly[tiab] OR barrierlike[tiab] OR barrieriness[tiab] OR barrierpressure[tiab] OR barrierred[tiab] OR barriers[tiab] OR barriers'[tiab] OR barriersas[tiab] OR barriersfor[tiab] OR barriersto[tiab]) OR "Equity"[tiab] OR "equitable"[tiab] OR (facilitator[tiab] OR facilitator'[tiab] OR facilitator's[tiab] OR facilitator1[tiab] OR facilitatories[tiab] OR facilitators[tiab] OR facilitators'[tiab] OR facilitatory[tiab] OR facilitatory'[tiab]) OR (inequalites[tiab] OR inequality[tiab] OR inequalities[tiab] OR inequalities'[tiab] OR inequalityies[tiab] OR inequality[tiab] OR inequality'[tiab] OR inequality's[tiab]) OR (inequitable[tiab] OR inequitably[tiab] OR inequities[tiab] OR inequities'[tiab] OR inequitous[tiab] OR inequity[tiab] OR inequity'[tiab])))

#### Scopus Search Terms

((TITLE-ABS-KEY({Mental Health Services}) OR TITLE-ABS-KEY({Mental Health Service}) OR TITLE-ABS-KEY({mental health care}) OR TITLE-ABS-KEY({mental health provider}) OR TITLE-ABS-KEY({mental health providers}) OR TITLE-ABS-KEY({psychiatrist}) OR TITLE-ABS-KEY({psychiatrists}) OR TITLE-ABS-KEY({psychotherapist}) OR TITLE-ABS-KEY({psychotherapists}) OR TITLE-ABS-KEY({Community Mental Health Service}) OR TITLE-ABS-KEY({Community Mental Health Services}) OR TITLE-ABS-KEY({mental health treatment}) OR TITLE-ABS-KEY({psychotherapy}) OR TITLE-ABS-KEY({mental health counseling }) OR TITLE-ABS-KEY({psychiatric counseling }) OR TITLE-ABS-KEY({emotional counseling }) OR TITLE-ABS-KEY({Community Mental Health Services}) OR TITLE-ABS-KEY({Psychotherapeutic Processes}) OR TITLE-ABS-KEY({Psychotherapeutic Processes}) OR TITLE-ABS-KEY({Psychiatric Social Work}) OR TITLE-ABS-KEY({Psychiatric Social Worker})) AND (TITLE-ABS-KEY({Mental Disorder}) OR TITLE-ABS-KEY({Mental Disorders}) OR TITLE-ABS-KEY({mental illness}) OR TITLE-ABS-KEY({SMI}) OR TITLE-ABS-KEY({depression}) OR TITLE-ABS-KEY({depressive}) OR TITLE-ABS-KEY({depressive disorder}) OR TITLE-ABS-KEY({depressive disorders}) OR TITLE-ABS-KEY({major depressive disorder}) OR TITLE-ABS-KEY({major depressive disorders}) OR TITLE-ABS-KEY({major depressive episode}) OR TITLE-ABS-KEY({major depressive episodes}) OR TITLE-ABS-KEY({mood disorder}))

OR TITLE-ABS-KEY({mood disorders}) OR TITLE-ABS-KEY({seasonal affective disorder}) OR TITLE-ABS-KEY({seasonal affective disorders}) OR TITLE-ABS-KEY({affective disorder}) OR TITLE-ABS-KEY({affective disorders}) OR TITLE-ABS-KEY({dysthymic disorder}) OR TITLE-ABS-KEY({dysthymic disorders}) OR TITLE-ABS-KEY({dysthymia}) OR TITLE-ABS-KEY({anxiety}) OR TITLE-ABS-KEY({phobic disorder}) OR TITLE-ABS-KEY({phobic disorders}) OR TITLE-ABS-KEY({panic disorder}) OR TITLE-ABS-KEY({panic disorders}) OR TITLE-ABS-KEY({panic attack}) OR TITLE-ABS-KEY({panic attacks}) OR TITLE-ABS-KEY({generalized anxiety disorder}) OR TITLE-ABS-KEY({generalized anxiety disorders}) OR TITLE-ABS-KEY({post traumatic stress disorder}) OR TITLE-ABS-KEY({post-traumatic stress disorder}) OR TITLE-ABS-KEY({post traumatic stress disorders}) OR TITLE-ABS-KEY({post-traumatic stress disorders}) OR TITLE-ABS-KEY({ptsd}) OR TITLE-ABS-KEY({Schizophrenia}) OR TITLE-ABS-KEY({bipolar}) OR TITLE-ABS-KEY({bipolar disorder}) OR TITLE-ABS-KEY({bipolar disorder})) AND (TITLE-ABS-KEY({African Americans}) OR TITLE-ABS-KEY({African Continental Ancestry Group}) OR TITLE-ABS-KEY({African immigrants}) OR TITLE-ABS-KEY({African-Americans}) OR TITLE-ABS-KEY({Alaska native}) OR TITLE-ABS-KEY({Alaska natives}) OR TITLE-ABS-KEY({Alaskan Native}) OR TITLE-ABS-KEY({American Indian}) OR TITLE-ABS-KEY({Asian Americans}) OR TITLE-ABS-KEY({Asian Continental Ancestry Group}) OR TITLE-ABS-KEY({Asian}) OR TITLE-ABS-KEY({Asian-Americans}) OR TITLE-ABS-KEY({Asians}) OR TITLE-ABS-KEY({Asiatic Race}) OR TITLE-ABS-KEY({Asiatic Races}) OR TITLE-ABS-KEY({bi racial}) OR TITLE-ABS-KEY({bi-racial}) OR TITLE-ABS-KEY({Black Asian}) OR TITLE-ABS-KEY({Black Hispanic}) OR TITLE-ABS-KEY({Black white}) OR TITLE-ABS-KEY({black}) OR TITLE-ABS-KEY({Black-Asian}) OR TITLE-ABS-KEY({Black-Hispanic}) OR TITLE-ABS-KEY({blacks}) OR TITLE-ABS-KEY({Black-white}) OR TITLE-ABS-KEY({Burmese}) OR TITLE-ABS-KEY({Burmese}) OR TITLE-ABS-KEY({Cambodian}) OR TITLE-ABS-KEY({Cambodians}) OR TITLE-ABS-KEY({Carolinian}) OR TITLE-ABS-KEY({Chamorros}) OR TITLE-ABS-KEY({Cherokee}) OR TITLE-ABS-KEY({Chicana}) OR TITLE-ABS-KEY({Chicanas}) OR TITLE-ABS-KEY({Chicano}) OR TITLE-ABS-KEY({Chicanos}) OR TITLE-ABS-KEY({Chinese}) OR TITLE-ABS-KEY({Chippewa}) OR TITLE-ABS-KEY({Chuukese}) OR TITLE-ABS-KEY({emigrants & immigrant}) OR TITLE-ABS-KEY({emigrants & immigrants}) OR TITLE-ABS-KEY({emigrants and immigrant}) OR TITLE-ABS-KEY({emigrants and immigrants}) OR TITLE-ABS-KEY({Eskimo}) OR TITLE-ABS-KEY({ethicized}) OR TITLE-ABS-KEY({ethnic }) OR TITLE-ABS-KEY({ethnic group}) OR TITLE-ABS-KEY({ethnic groups}) OR TITLE-ABS-KEY({ethnic minorities}) OR TITLE-ABS-KEY({ethnic minority}) OR TITLE-ABS-KEY({ethnic origins}) OR TITLE-ABS-KEY({Ethnic racial}) OR TITLE-ABS-KEY({ethnic s}) OR TITLE-ABS-KEY({ethnic sensitive}) OR TITLE-ABS-KEY({ethnical}) OR TITLE-ABS-KEY({ethnically}) OR TITLE-ABS-KEY({ethnicities}) OR TITLE-ABS-KEY({ethnicity related}) OR TITLE-ABS-KEY({ethnicity}) OR TITLE-ABS-KEY({ethnicity-related}) OR TITLE-ABS-KEY({ethnicity-wise}) OR TITLE-ABS-KEY({Ethnoracial }) OR TITLE-ABS-KEY({Ethno-racial}) OR TITLE-ABS-KEY({Ethnospecific}) OR TITLE-ABS-KEY({Ethno-specific}) OR TITLE-ABS-KEY({Fijian}) OR TITLE-ABS-KEY({Guamanian}) OR TITLE-ABS-KEY({Hispanic American}) OR TITLE-ABS-KEY({Hispanic Americans}) OR TITLE-ABS-KEY({Hispanic}) OR TITLE-ABS-KEY({Hispanics}) OR TITLE-ABS-KEY({indigenous migrants}) OR TITLE-ABS-KEY({interracial}) OR TITLE-ABS-KEY({inter-racial}) OR TITLE-ABS-KEY({interracially}) OR TITLE-ABS-KEY({interracials}) OR TITLE-ABS-KEY({Inuit}) OR TITLE-ABS-KEY({Inuits}) OR TITLE-ABS-KEY({Inuk}) OR TITLE-ABS-KEY({Inuks}) OR TITLE-ABS-KEY({Japanese}) OR TITLE-ABS-KEY({Korean}) OR TITLE-ABS-KEY({Koreans}) OR TITLE-ABS-KEY({Kosraean}) OR TITLE-ABS-KEY({Latina}) OR TITLE-ABS-KEY({Latinas}) OR TITLE-ABS-KEY({Latino}) OR TITLE-ABS-KEY({Latinos}) OR TITLE-ABS-

KEY({Latino-white}) OR TITLE-ABS-KEY({Melanesian}) OR TITLE-ABS-KEY({Mexican American}) OR TITLE-ABS-KEY({Mexican Americans}) OR TITLE-ABS-KEY({Mexican}) OR TITLE-ABS-KEY({Micronesian}) OR TITLE-ABS-KEY({Minority group}) OR TITLE-ABS-KEY({Minority groups}) OR TITLE-ABS-KEY({mixed race}) OR TITLE-ABS-KEY({mixed races}) OR TITLE-ABS-KEY({mixed-race}) OR TITLE-ABS-KEY({Mongoloid Race}) OR TITLE-ABS-KEY({Mongoloid Races}) OR TITLE-ABS-KEY({multiracial}) OR TITLE-ABS-KEY({multi-racial}) OR TITLE-ABS-KEY({multiracials}) OR TITLE-ABS-KEY({Native American}) OR TITLE-ABS-KEY({Native Americans}) OR TITLE-ABS-KEY({Native Hawaiian}) OR TITLE-ABS-KEY({Navajo}) OR TITLE-ABS-KEY({North American Indians}) OR TITLE-ABS-KEY({Oceanic Ancestry Group}) OR TITLE-ABS-KEY({Pacific Island American}) OR TITLE-ABS-KEY({Pacific Islander}) OR TITLE-ABS-KEY({Palauan}) OR TITLE-ABS-KEY({Papua New Guinean}) OR TITLE-ABS-KEY({Polynesian}) OR TITLE-ABS-KEY({Puerto Rican}) OR TITLE-ABS-KEY({Puerto Ricans}) OR TITLE-ABS-KEY({race disparities}) OR TITLE-ABS-KEY({race-disparities}) OR TITLE-ABS-KEY({Racial ethnic}) OR TITLE-ABS-KEY({Racial-ethnic}) OR TITLE-ABS-KEY({Samoan}) OR TITLE-ABS-KEY({Samoan}) OR TITLE-ABS-KEY({Sioux}) OR TITLE-ABS-KEY({Solomon Islander}) OR TITLE-ABS-KEY({Tahitian}) OR TITLE-ABS-KEY({Thai}) OR TITLE-ABS-KEY({Tokelauan}) OR TITLE-ABS-KEY({Tongan}) OR TITLE-ABS-KEY({Trukese}) OR TITLE-ABS-KEY({Vietnamese}) OR TITLE-ABS-KEY({Visible minority immigrants}) OR TITLE-ABS-KEY({Yapese})) AND (TITLE-ABS-KEY({access}) OR TITLE-ABS-KEY({accessibility}) OR TITLE-ABS-KEY({availability}) OR TITLE-ABS-KEY({delay to treatment}) OR TITLE-ABS-KEY({depression visits}) OR TITLE-ABS-KEY({episodes of care}) OR TITLE-ABS-KEY({health insurance}) OR TITLE-ABS-KEY({medication visits}) OR TITLE-ABS-KEY({mental health visits}) OR TITLE-ABS-KEY({Patient acceptance of health care}) OR TITLE-ABS-KEY({treatment episodes}) OR TITLE-ABS-KEY({underutilization}) OR TITLE-ABS-KEY({underutilization}) OR TITLE-ABS-KEY({underutilization}) OR TITLE-ABS-KEY({underutilizations}) OR TITLE-ABS-KEY({underutilize}) OR TITLE-ABS-KEY({underutilized}) OR TITLE-ABS-KEY({underutilized}) OR TITLE-ABS-KEY({utilization}) OR TITLE-ABS-KEY({health service use}) OR TITLE-ABS-KEY({inequality}) OR TITLE-ABS-KEY({inequalities}) OR TITLE-ABS-KEY({inequitable}) OR TITLE-ABS-KEY({inequity}) OR TITLE-ABS-KEY({inequities}) OR TITLE-ABS-KEY({iniquitous}) OR TITLE-ABS-KEY({disparities}) OR TITLE-ABS-KEY({disparity}) OR TITLE-ABS-KEY({affordability}) OR TITLE-ABS-KEY({affordable}) OR TITLE-ABS-KEY({access}) OR TITLE-ABS-KEY({accessibility}) OR TITLE-ABS-KEY({accessible}) OR TITLE-ABS-KEY({available}) OR TITLE-ABS-KEY({availability}) OR TITLE-ABS-KEY({acceptability}})) AND ( LIMIT-TO(AFFILCOUNTRY,"United States" ) ) AND ( LIMIT-TO(DOCTYPE,"ar" ) OR LIMIT-TO(DOCTYPE,"re" ) ) AND ( LIMIT-TO(LANGUAGE,"English" ) )

Psych Info Search Terms: Used PubMed search terms to search directly on Psych Info website.
